# Supplementary material for: Underestimation of Self-Reported Smoking Prevalence in Korean Adolescents: Evidence from Gold Standard by Combined Method
Source: MDPI journal article supplement (doi:10.3390/ijerph15040689), 2018-04-05
Supplement: s1 [file s1]

## Supplementary Materials

Table S1. General Characteristics of Study Population by Sex

|                                                  |                  | Boys (N=444) |      | Girls (N=615) |      | P value |
|--------------------------------------------------|------------------|--------------|------|---------------|------|---------|
|                                                  |                  | N            | %    | N             | %    |         |
| Grade                                            | 10 <sup>th</sup> | 186          | 41.9 | 166           | 27.0 | <0.001  |
|                                                  | 11 <sup>th</sup> | 186          | 41.9 | 195           | 31.7 |         |
|                                                  | 12 <sup>th</sup> | 72           | 16.2 | 254           | 41.3 |         |
| Perceived threat to confidentiality <sup>a</sup> | Yes              | 104          | 23.5 | 132           | 21.5 | 0.455   |
|                                                  | No               | 339          | 76.5 | 481           | 78.5 |         |
| Closest friend smoking                           | None             | 122          | 27.5 | 462           | 75.1 | <0.001  |
|                                                  | Some             | 242          | 54.5 | 139           | 22.6 |         |
|                                                  | Most/All         | 80           | 18.0 | 14            | 2.3  |         |

<sup>a</sup> 1 boy and 2 girls were excluded due to missing data of question item

Table S2. Validity Evaluation of Anonymous Self-reported Current Drinking Between First and Second Survey

| 2 <sup>nd</sup> Survey | 1 <sup>st</sup> Survey | Total (N=1,059) |              | Boys (N=444)    |              | Girls (N=615)   |              |
|------------------------|------------------------|-----------------|--------------|-----------------|--------------|-----------------|--------------|
|                        |                        | Current drinker |              | Current drinker |              | Current drinker |              |
|                        |                        | Yes             | No           | Yes             | No           | Yes             | No           |
| Current drinker        | Yes                    | 183(69.9)       | 79(30.2)     | 99(73.3)        | 36(26.7)     | 84(66.1)        | 43(33.9)     |
|                        | No                     | 72(9.0)         | 725(91.0)    | 29(9.4)         | 280(90.6)    | 43(8.8)         | 445(91.2)    |
| Validity indicator     |                        | Value           | 95% CI       | Value           | 95% CI       | Value           | 95% CI       |
| Sensitivity (%)        |                        | 69.9            | 63.9, 75.3   | 73.3            | 65.0, 80.6   | 66.1            | 57.2, 74.3   |
| Specificity (%)        |                        | 91.0            | 88.8, 92.9   | 90.6            | 86.8, 93.6   | 91.2            | 88.3, 93.6   |
| Kappa                  |                        | 0.614           | 0.558, 0.669 | 0.649           | 0.571, 0.727 | 0.573           | 0.493, 0.654 |

Abbreviation: CI, confidence interval

Table S3. Validity evaluation of Anonymous Self-reported Height Between First and Second Survey

| Sex   | N <sup>a</sup> | 1 <sup>st</sup> Survey | 2 <sup>nd</sup> Survey | Difference | Equivalence test <sup>b</sup> |
|-------|----------------|------------------------|------------------------|------------|-------------------------------|
|       |                | mean (SD)              | mean (SD)              | mean (SD)  |                               |
| Boys  | 434            | 173.7 (6.1)            | 173.9 (5.9)            | -0.2 (1.6) | Equivalent                    |
| Girls | 601            | 160.6 (5.2)            | 160.7 (5.4)            | -0.1 (1.6) | Equivalent                    |

<sup>a</sup> 10 boys and 14 girls were excluded due to missing data of height

<sup>b</sup> Paired T-test for equivalence (equivalence bounds:  $\pm 1$  cm)
